# Supplementary material
Source: PubMed Central journal article supplement (PMC8031332)
Supplement: JCH-20-1039-s001.pdf [file JCH-20-1039-s001.pdf]

# Supplementary Materials

Supplementary Table 1. Correlation analysis of blood pressure parameters with demographics and PSG-derived parameters (N=232)

|                              | Hypoxia-peak SBP |        | Mean nocturnal SBP |      | Minimum nocturnal SBP |      | Morning SBP |      | Evening SBP |        |
|------------------------------|------------------|--------|--------------------|------|-----------------------|------|-------------|------|-------------|--------|
|                              | r                | P      | r                  | P    | r                     | P    | r           | P    | r           | P      |
| Age, y                       | -0.15            | 0.03   | -0.06              | 0.33 | 0.02                  | 0.78 | 0.02        | 0.81 | -0.16       | 0.02   |
| Sex (0:W, 1:M)               | 0.01             | 0.94   | 0.08               | 0.23 | 0.06                  | 0.37 | 0.13        | 0.05 | 0.05        | 0.48   |
| BMI, kg/m <sup>2</sup>       | 0.26             | <0.001 | 0.12               | 0.07 | -0.15                 | 0.03 | 0.13        | 0.05 | 0.33        | <0.001 |
| Apnea Hypopnea Index, per hr | 0.25             | <0.001 | 0.05               | 0.50 | -0.03                 | 0.67 | 0.02        | 0.77 | 0.07        | 0.28   |
| Apnea Index, per hr          | 0.15             | <0.01  | -0.04              | 0.54 | -0.10                 | 0.14 | -0.02       | 0.75 | 0.02        | 0.78   |
| Arousal Index, per hr        | 0.09             | 0.17   | -0.05              | 0.47 | -0.05                 | 0.44 | -0.01       | 0.92 | -0.05       | 0.49   |
| Lowest SpO <sub>2</sub> , %  | -0.40            | <0.001 | -0.09              | 0.15 | 0.16                  | 0.02 | -0.06       | 0.37 | -0.13       | 0.05   |
| SpO <sub>2</sub> < 90%, %    | 0.36             | <0.001 | 0.15               | 0.02 | -0.11                 | 0.09 | -0.11       | 0.08 | 0.24        | <0.001 |

The individual values for each night (116 patients x 2 nights) were used in the analysis. Pearson's correlation analysis was used for all variables except sex. PSG, polysomnography; BMI, body mass index; SBP, systolic blood pressure; SpO<sub>2</sub>, oxygen saturation.

Supplementary Table 2. Correlation analysis of nocturnal blood pressure variability with demographics and PSG-derived parameters (N=232)

|                              | Nocturnal SBP surge<br>by oxygen-triggered<br>measurement |        | SD of nocturnal SBP<br>by fixed-interval measurement |       |
|------------------------------|-----------------------------------------------------------|--------|------------------------------------------------------|-------|
|                              | r                                                         | P      | r                                                    | P     |
| Age, y                       | -0.21                                                     | <0.01  | 0.09                                                 | 0.17  |
| Sex (0:W, 1:M)               | 0.05                                                      | 0.45   | -0.02                                                | 0.72  |
| BMI, kg/m <sup>2</sup>       | 0.26                                                      | <0.001 | 0.21                                                 | <0.01 |
| Apnea Hypopnea Index, per hr | 0.34                                                      | <0.001 | 0.06                                                 | 0.34  |
| Apnea Index, per hr          | 0.32                                                      | <0.001 | 0.07                                                 | 0.27  |
| Arousal Index, per hr        | 0.19                                                      | <0.01  | -0.04                                                | 0.58  |
| Lowest SpO <sub>2</sub> , %  | -0.46                                                     | <0.001 | -0.26                                                | <0.01 |
| SpO <sub>2</sub> < 90%, %    | 0.36                                                      | <0.01  | 0.23                                                 | <0.01 |

Individual values for each night (116 patients x 2 nights) were used in the analysis. Pearson's correlation analysis was used for all variables except sex. PSG, polysomnography; BMI, body mass index; SBP, systolic blood pressure; SpO<sub>2</sub>, oxygen saturation; SD, standard deviation.

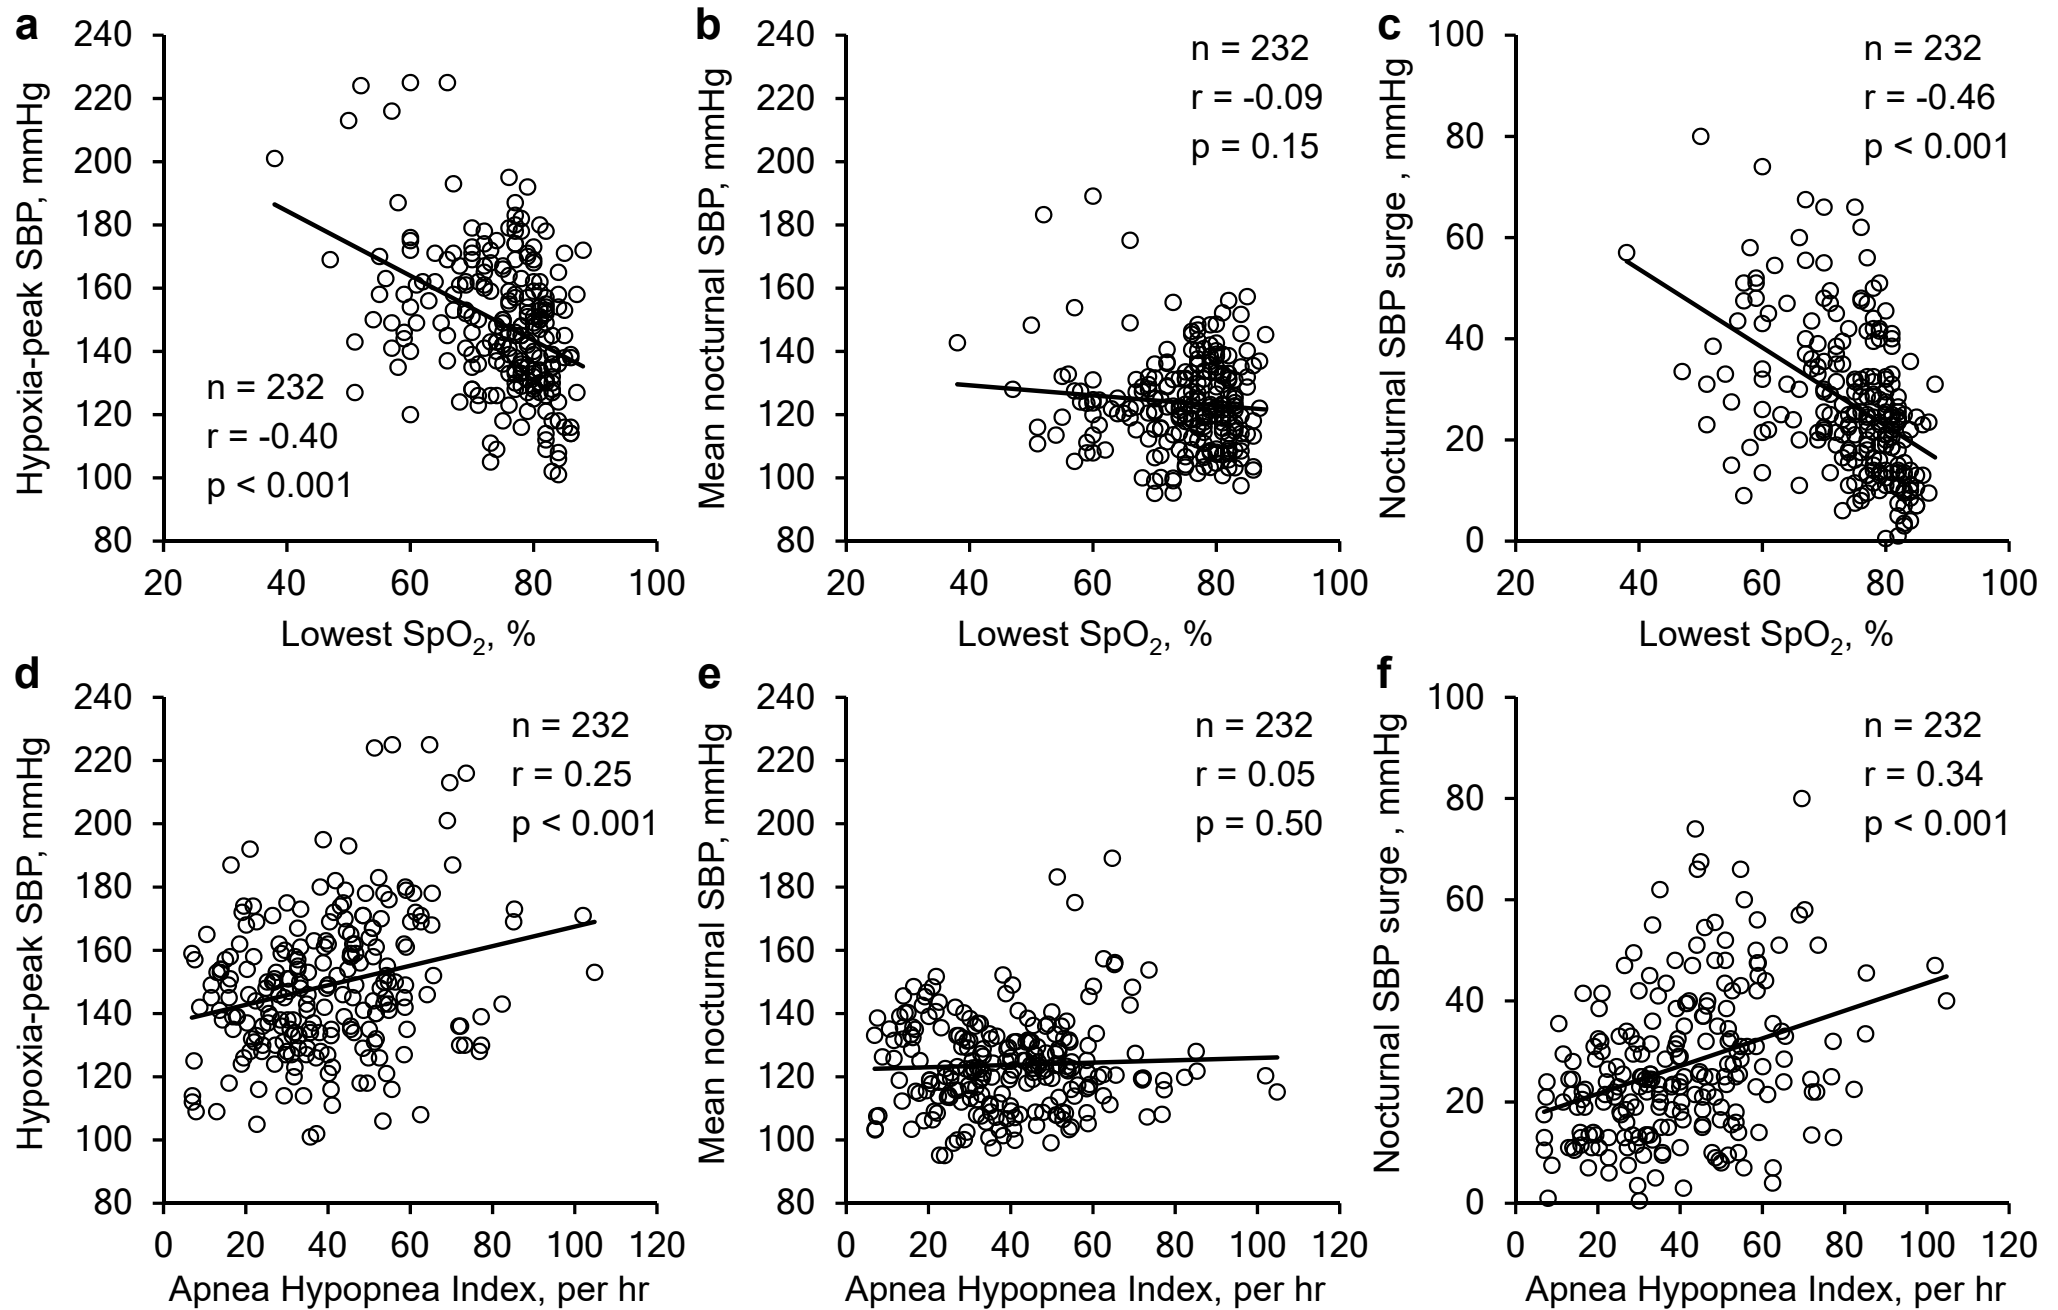

Supplementary Figure 1. Scatter plots of the linear relationships between the lowest SpO<sub>2</sub> value and each of hypoxia-peak SBP (a), mean nocturnal SBP (b) and nocturnal SBP surge (c) and those between the apnea hypopnea index and each of hypoxia-peak SBP (d), mean nocturnal SBP (e) and nocturnal SBP surge (f). The individual values for each night (116 patients x 2 nights) were used in the Pearson's correlation analysis. SBP, systolic blood pressure; SpO<sub>2</sub>, oxygen saturation.

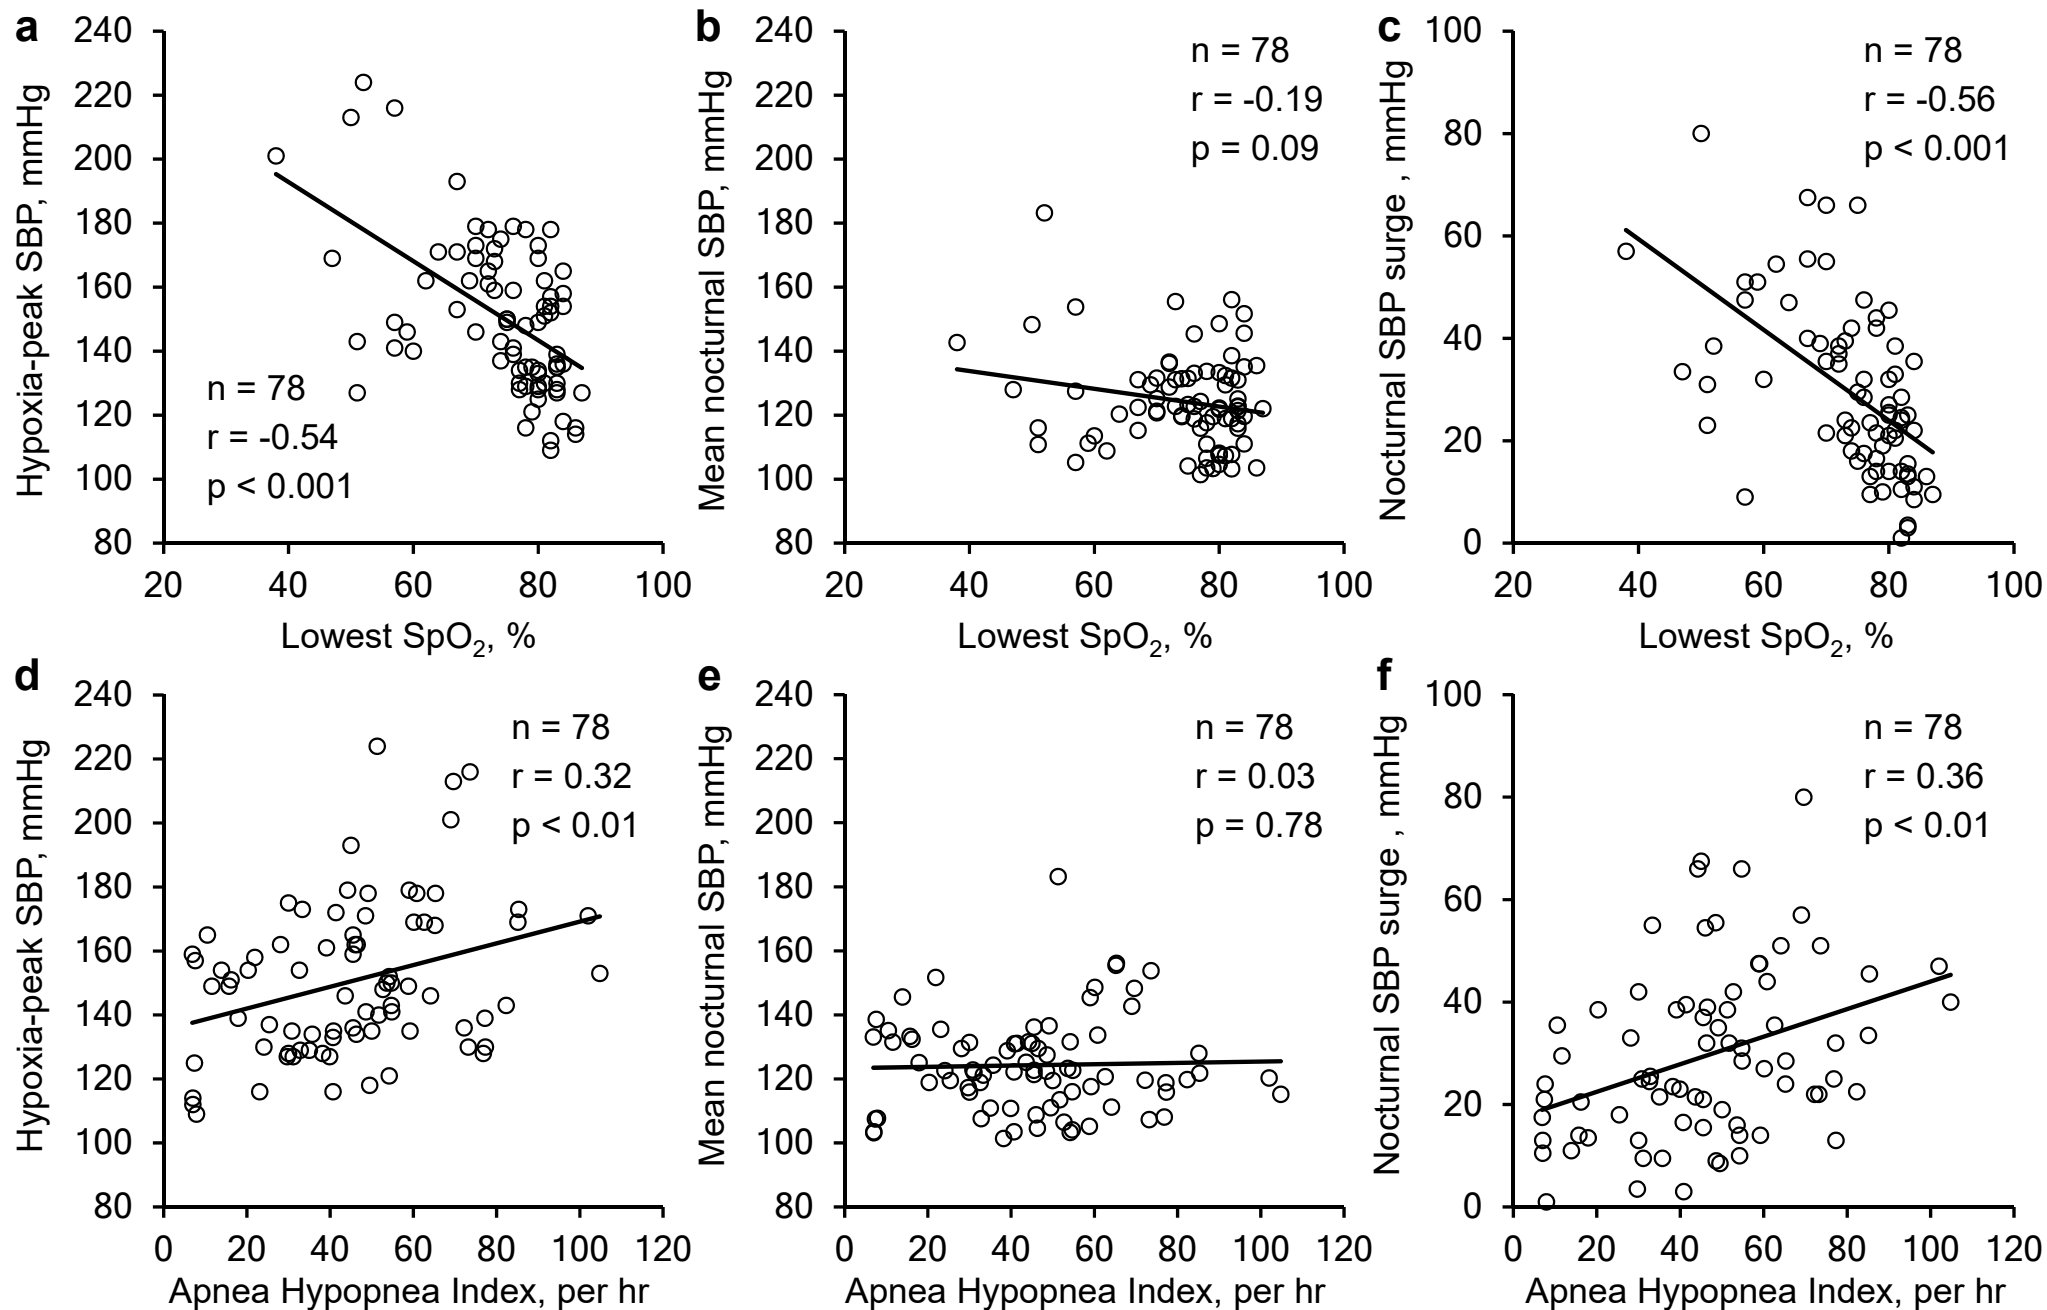

Supplementary Figure 2. Scatter plots of the linear relationships between the lowest SpO<sub>2</sub> value and each of hypoxia-peak SBP (a), mean nocturnal SBP (b) and nocturnal SBP surge (c) and those between apnea hypopnea index and each of hypoxia-peak SBP (d), mean nocturnal SBP (e) and nocturnal SBP surge (f). The individual values for each night (39 non-medicated hypertensive patients x 2 nights) were used in the analysis. Pearson's correlation analysis was used. SBP, systolic blood pressure; SpO<sub>2</sub>, oxygen saturation.

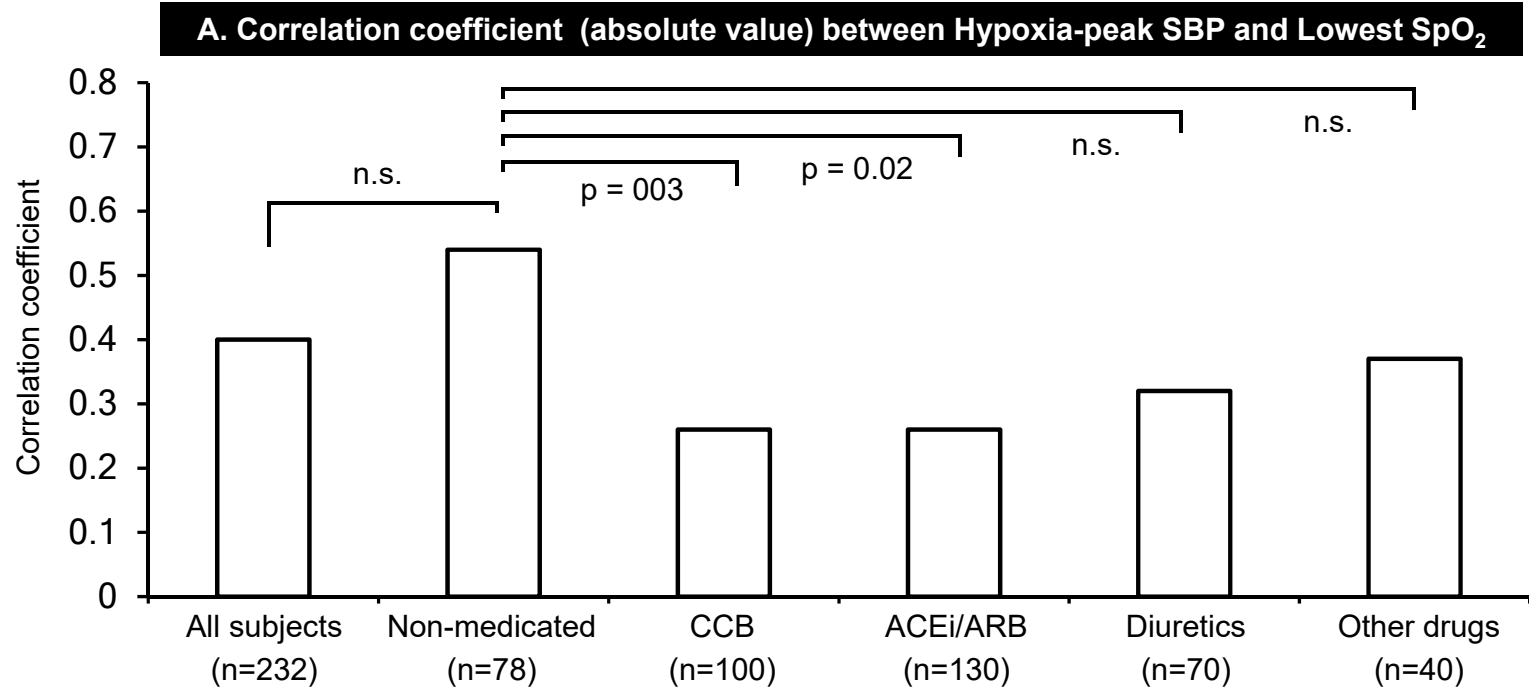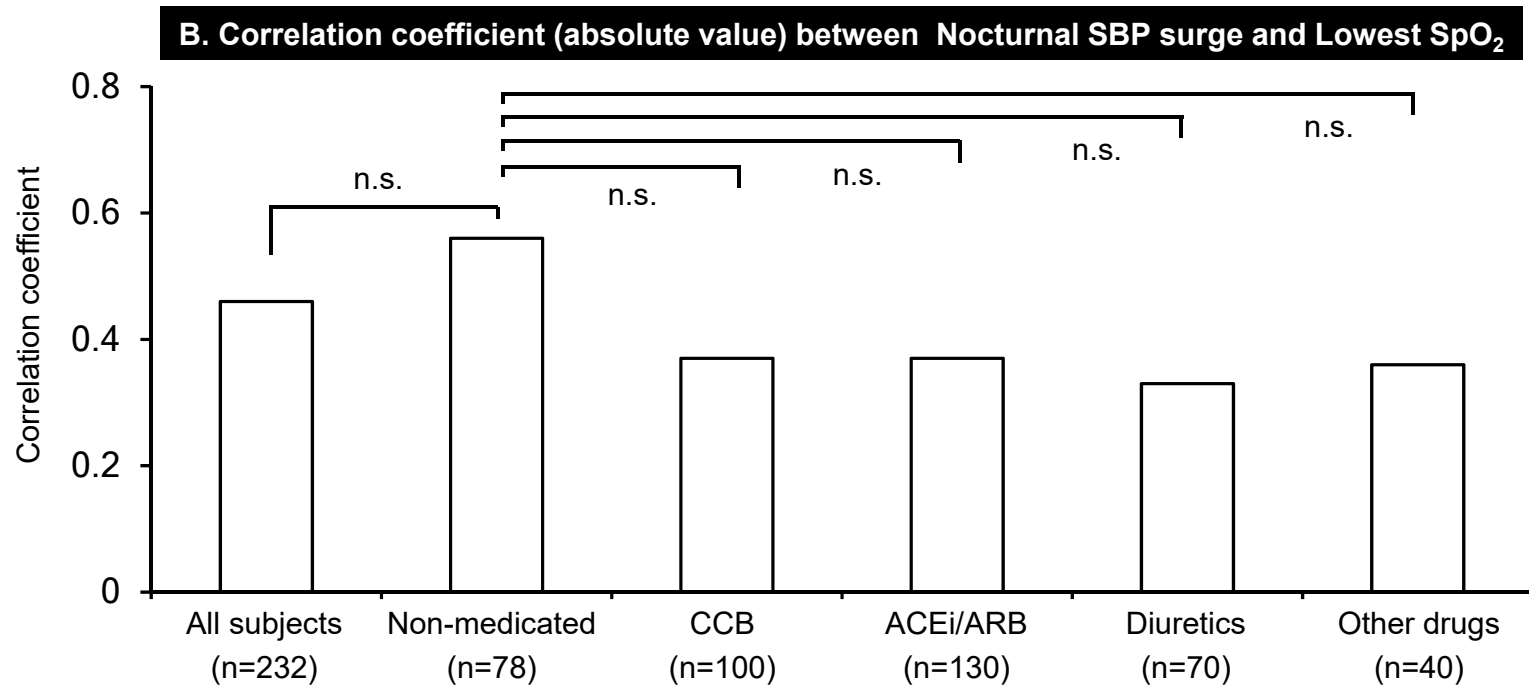

Supplementary Figure 3. Correlation coefficient (absolute value) between (A) hypoxia-peak SBP and lowest SpO<sub>2</sub> and (B) nocturnal SBP surge and lowest SpO<sub>2</sub> in subgroups of patients receiving different classes of hypertensive medication. SBP, systolic blood pressure; CCB, calcium-channel blockers; ACEi, angiotensin-converting enzyme inhibitor; ARB, angiotensin receptor blocker; SpO<sub>2</sub>, oxygen saturation.
